# Supplementary material for: Global Linkage Map Connects Meiotic Centromere Function to Chromosome Size in Budding Yeast
Source: PubMed Central journal article supplement (PMC3789798; doi:10.1534/g3.113.007377), 2013-10-01
Supplement: supp_g3.113.007377_FigureS3.pdf [file supp_g3.113.007377_FigureS3.pdf]

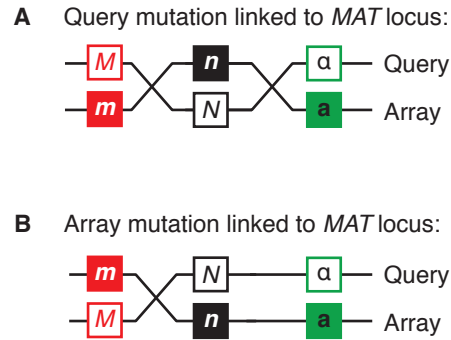

**Figure S3** Chromosome III carries the yeast mating type locus (*MAT*), which determines the mating type of a yeast haploid cell and distinguishes array and query mutants, which are *MATa* and *MAT $\alpha$* , respectively. Since SGA selects specifically for *MATa* meiotic progeny, a query mutant *n* (**A**, filled black square), located between gene *M* (**A**, empty red square) and the *MAT* locus (**A**, empty green square), requires a double recombination event to acquire both the array mutation *m* (**A**, filled red square) and the *MATa* information (**A**, filled green square). The array mutant *n*, however, (**B**, filled black square), being already linked to *MATa*, only requires one recombination event to acquire query mutation *m* (**B**, filled red square). As a result, query and array mutants linked to the *MAT* locus show different degrees of linkage to nearby genes, and averaging their genetic linkage maps would conceal the true recombination activity occurring within the region.
