# Supplementary material for: Global Linkage Map Connects Meiotic Centromere Function to Chromosome Size in Budding Yeast
Source: PubMed Central journal article supplement (PMC3789798; doi:10.1534/g3.113.007377), 2013-10-01
Supplement: supp_g3.113.007377_FigureS4.pdf [file supp_g3.113.007377_FigureS4.pdf]

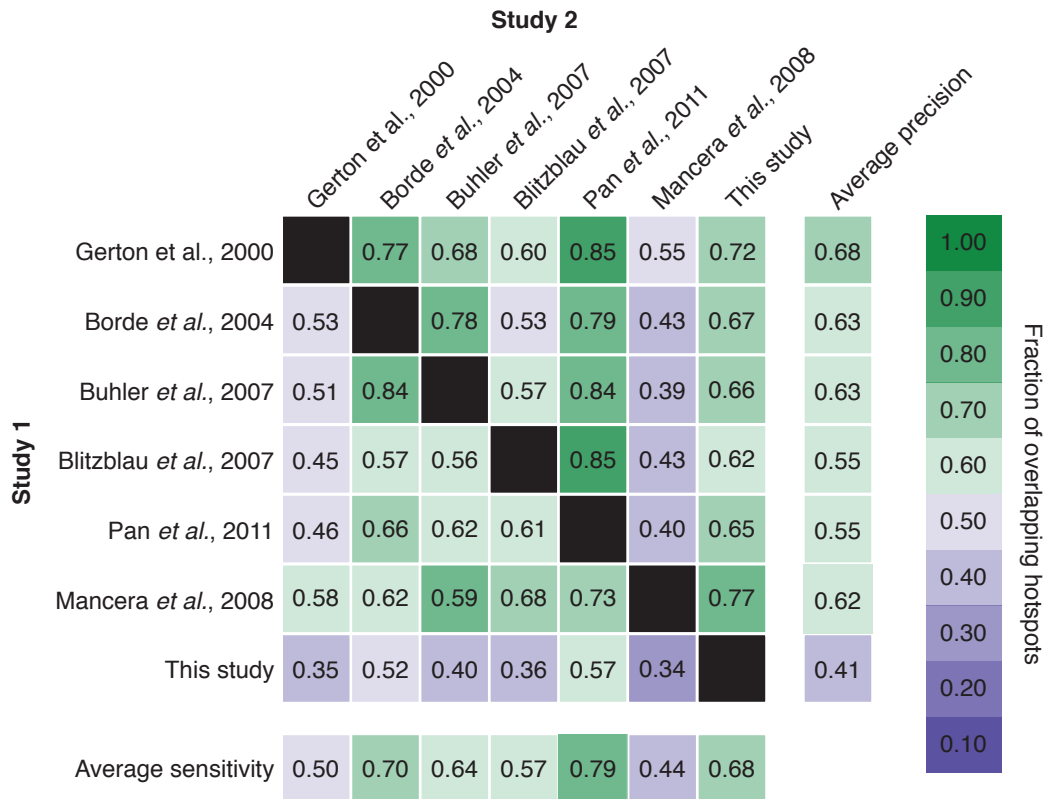

**Figure S4** The overlap between any two datasets is visualized as a heatmap/table, where colors and numbers reflect the fraction of hotspots identified by study 1 (row labels) that are located within 10 kb from a hotspot identified by study 2 (column labels). For example, of all hotspots identified by Gerton *et al.* (row label), 77% were also identified by Borde *et al.* (column label), and, vice versa, of all hotspots identified by Borde *et al.* (row label), 53% were also identified by Gerton *et al.* (column label).
