# Supplementary material for: Global Linkage Map Connects Meiotic Centromere Function to Chromosome Size in Budding Yeast
Source: PubMed Central journal article supplement (PMC3789798; doi:10.1534/g3.113.007377), 2013-10-01
Supplement: supp_g3.113.007377_FigureS5.pdf [file supp_g3.113.007377_FigureS5.pdf]

|                                | Centromere linkage |              |                             |              | Overall linkage (control) |              |                             |              |
|--------------------------------|--------------------|--------------|-----------------------------|--------------|---------------------------|--------------|-----------------------------|--------------|
|                                | All chromosomes    |              | All chrs., excl. 4 smallest |              | All chromosomes           |              | All chrs., excl. 4 smallest |              |
|                                | <i>R</i>           | <i>p-val</i> | <i>R</i>                    | <i>p-val</i> | <i>R</i>                  | <i>p-val</i> | <i>R</i>                    | <i>p-val</i> |
| This study                     | 0.77               | 0.01         | 0.66                        | 0.03         | 0.74                      | 0.001        | 0.44                        | 0.15         |
| SGD                            | 0.70               | 0.002        | 0.42                        | 0.17         | 0.64                      | 0.008        | 0.05                        | 0.87         |
| Gerton <i>et al.</i> , 2000    | 0.78               | 0.0003       | 0.74                        | 0.006        | 0.46                      | 0.08         | -0.07                       | 0.82         |
| Borde <i>et al.</i> , 2004     | 0.79               | 0.001        | 0.92                        | 0.0002       | 0.25                      | 0.34         | 0.04                        | 0.89         |
| Buhler <i>et al.</i> , 2007    | 0.63               | 0.04         | 0.72                        | 0.03         | 0.33                      | 0.22         | 0.15                        | 0.64         |
| Blitzblau <i>et al.</i> , 2007 | 0.59               | 0.02         | 0.67                        | 0.02         | 0.62                      | 0.01         | 0.11                        | 0.74         |

**Figure S5** Pearson correlation coefficients and the corresponding significance p-values were computed between chromosome size and centromere-proximal recombination reported by several published studies, as described in Methods.
