# Supplementary material for: Global Linkage Map Connects Meiotic Centromere Function to Chromosome Size in Budding Yeast
Source: PubMed Central journal article supplement (PMC3789798; doi:10.1534/g3.113.007377), 2013-10-01
Supplement: supp_g3.113.007377_FigureS6.pdf [file supp_g3.113.007377_FigureS6.pdf]

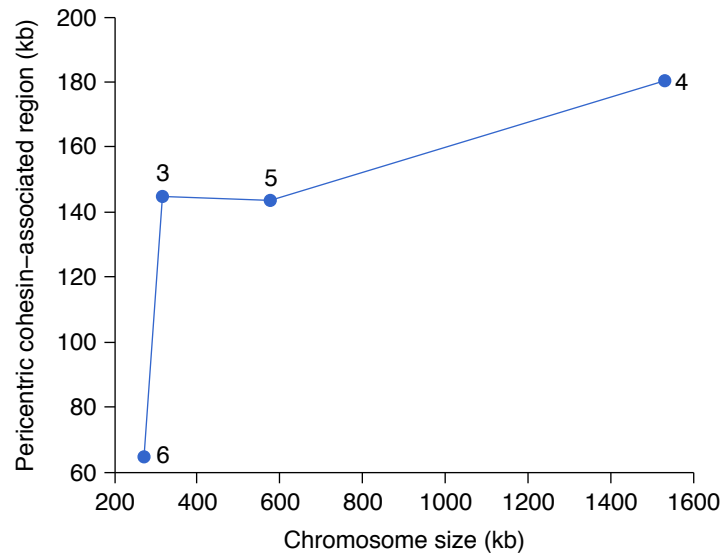

**Figure S6** Relationship between chromosome size and centromere-associated cohesin clustering, measured from data reported previously (Kugou et al. 2009). Data relative to 1.5 hours after induction of meiosis are shown. Each data point corresponds to a chromosome, labeled by the number. Pearson correlation coefficient is  $R = 0.73$  but not significant ( $p$ -value  $< 0.27$ ).
