# Supplementary material for: Global Linkage Map Connects Meiotic Centromere Function to Chromosome Size in Budding Yeast
Source: PubMed Central journal article supplement (PMC3789798; doi:10.1534/g3.113.007377), 2013-10-01
Supplement: supp_g3.113.007377_SupplementaryReferences.pdf [file supp_g3.113.007377_SupplementaryReferences.pdf]

## Supplementary references

- Anscombe, F. J., 1973 Graphs in Statistical Analysis. *The American Statistician* **27**: 17-21.
- Bishop, D. K., and D. Zickler, 2004 Early decision; meiotic crossover interference prior to stable strand exchange and synapsis. *Cell* **117**: 9-15.
- Blitzblau, H. G., G. W. Bell, J. Rodriguez, S. P. Bell and A. Hochwagen, 2007 Mapping of meiotic single-stranded DNA reveals double-stranded-break hotspots near centromeres and telomeres. *Current biology* : CB **17**: 2003-2012.
- Borde, V., W. Lin, E. Novikov, J. H. Petrini, M. Lichten *et al.*, 2004 Association of Mre11p with double-strand break sites during yeast meiosis. *Molecular cell* **13**: 389-401.
- Buhler, C., V. Borde and M. Lichten, 2007 Mapping meiotic single-strand DNA reveals a new landscape of DNA double-strand breaks in *Saccharomyces cerevisiae*. *PLoS biology* **5**: e324.
- Cherry, J. M., E. L. Hong, C. Amundsen, R. Balakrishnan, G. Binkley *et al.*, 2012 *Saccharomyces* Genome Database: the genomics resource of budding yeast. *Nucleic acids research* **40**: D700-705.
- Gerton, J. L., J. Derisi, R. Shroff, M. Lichten, P. O. Brown *et al.*, 2000 Global mapping of meiotic recombination hotspots and coldspots in the yeast *Saccharomyces cerevisiae*. *Proceedings of the National Academy of Sciences of the United States of America* **97**: 11383-11390.
- Glynn, E. F., P. C. Megee, H. G. Yu, C. Mistrot, E. Unal *et al.*, 2004 Genome-wide mapping of the cohesin complex in the yeast *Saccharomyces cerevisiae*. *PLoS biology* **2**: E259.
- Jones, G. H., 1987 Chiasmata, pp. 213-244 in *Meiosis*, edited by P. B. MOENS. Academic Press, Orlando, FL.
- Kaback, D. B., D. Barber, J. Mahon, J. Lamb and J. You, 1999 Chromosome size-dependent control of meiotic reciprocal recombination in *Saccharomyces cerevisiae*: the role of crossover interference. *Genetics* **152**: 1475-1486.
- Kaback, D. B., V. Guacci, D. Barber and J. W. Mahon, 1992 Chromosome size-dependent control of meiotic recombination. *Science* **256**: 228-232.
- Kiburz, B. M., D. B. Reynolds, P. C. Megee, A. L. Marston, B. H. Lee *et al.*, 2005 The core centromere and Sgo1 establish a 50-kb cohesin-protected domain around centromeres during meiosis I. *Genes & development* **19**: 3017-3030.

- Kugou, K., T. Fukuda, S. Yamada, M. Ito, H. Sasanuma *et al.*, 2009 Rec8 guides canonical Spo11 distribution along yeast meiotic chromosomes. *Mol Biol Cell* **20**: 3064-3076.
- Mancera, E., R. Bourgon, A. Brozzi, W. Huber and L. M. Steinmetz, 2008 High-resolution mapping of meiotic crossovers and non-crossovers in yeast. *Nature* **454**: 479-485.
- Pan, J., M. Sasaki, R. Kniewel, H. Murakami, H. G. Blitzblau *et al.*, 2011 A hierarchical combination of factors shapes the genome-wide topography of yeast meiotic recombination initiation. *Cell* **144**: 719-731.
- Pinsky, B. A., and S. Biggins, 2005 The spindle checkpoint: tension versus attachment. *Trends in cell biology* **15**: 486-493.
- Stahl, F. W., H. M. Foss, L. S. Young, R. H. Borts, M. F. Abdullah *et al.*, 2004 Does crossover interference count in *Saccharomyces cerevisiae*? *Genetics* **168**: 35-48.
