# Supplementary material for: Global Linkage Map Connects Meiotic Centromere Function to Chromosome Size in Budding Yeast
Source: PubMed Central journal article supplement (PMC3789798; doi:10.1534/g3.113.007377), 2013-10-01
Supplement: supp_g3.113.007377_TableS1.pdf [file supp_g3.113.007377_TableS1.pdf]

**Table S1 Data sources for large-scale recombination and cohesin binding studies**

| <b>Publication</b>             | <b>Data source</b>                                                                                                                |
|--------------------------------|-----------------------------------------------------------------------------------------------------------------------------------|
| (Gerton <i>et al.</i> 2000)    | Table 1                                                                                                                           |
| (Borde <i>et al.</i> 2004)     | Table S2                                                                                                                          |
| (Buhler <i>et al.</i> 2007)    | Table S5 (5X background)                                                                                                          |
| (Blitzblau <i>et al.</i> 2007) | Table S2                                                                                                                          |
| (Mancera <i>et al.</i> 2008)   | Supplementary information 2: hot_spots.txt                                                                                        |
| (Pan <i>et al.</i> 2011)       | Table S2 (signal intensity > 1000)                                                                                                |
| (Glynn <i>et al.</i> 2004)     | Mitotic cohesin subunit (Scc1/Mcd1): Supplementary dataset 8<br>Meiotic cohesin subunit (Rec8): Supplementary dataset 9           |
| (Kiburz <i>et al.</i> 2005)    | Supp Raw Data.doc                                                                                                                 |
| (Kugou <i>et al.</i> 2009)     | <a href="http://www.ncbi.nlm.nih.gov/geo/query/acc.cgi?acc=GSE8422">http://www.ncbi.nlm.nih.gov/geo/query/acc.cgi?acc=GSE8422</a> |
